# Supplementary material for: High efficiency P3HT:PCBM solar cells with an inserted PCBM layer
Source: Royal Society of Chemistry journal article supplement (doi:10.1039/c4tc00003j), 2014-01-01
Supplement: c4tc00003j1.pdf [file c4tc00003j1.pdf]

Supporting information

## High efficiency P3HT:PCBM solar cells with an inserted PCBM layer

Dan Chi,<sup>a,b</sup> Shengchun Qu,<sup>a</sup> Zhanguo Wang<sup>\*a</sup> and Jizheng Wang<sup>\*b</sup>

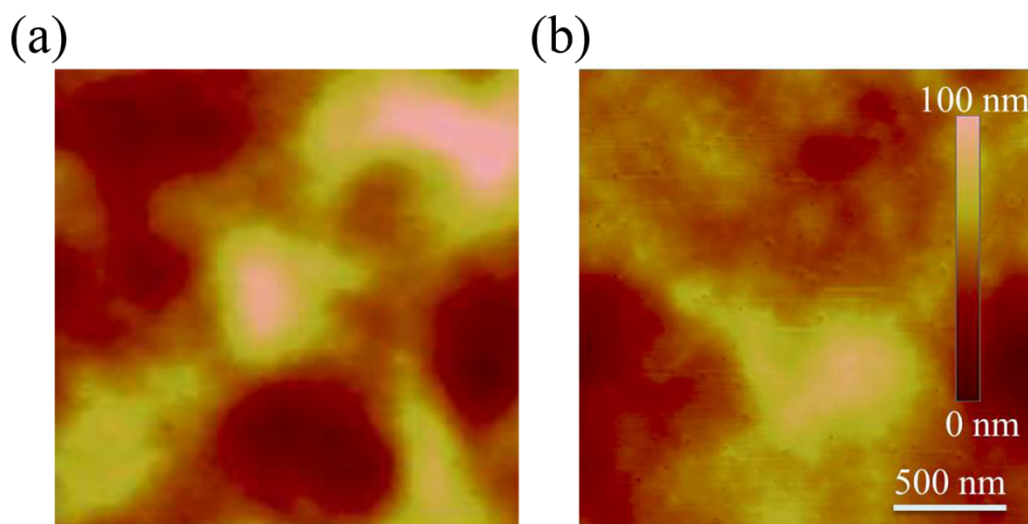

Fig. S1. Topography AFM images of P3HT:PCBM films (a) without PCBM buffer layer and (b) with 15 nm PCBM buffer layer. (a) shows a surface roughness of 16.1 nm, and (b) shows a surface roughness of 9.9 nm.
